# Supplementary material for: Special properties of luminescent magnetic NaGdF4:Yb3+, Er3+ upconversion nanocubes with surface modifications
Source: Royal Society of Chemistry journal article supplement (doi:10.1039/c7ra03380j), 2017-01-01
Supplement: c7ra03380j1.pdf [file c7ra03380j1.pdf]

Supplementary materials

## Special Properties of Luminescent Magnetic NaGdF<sub>4</sub>: Yb<sup>3+</sup>, Er<sup>3+</sup> Upconversion Nanocubes with Surface Modification

Longyi Chen,<sup>a</sup> Wai Hei Tse,<sup>b</sup> Alex Siemiarczuk,<sup>c</sup> and Jin Zhang<sup>a,b\*</sup>

Using the same method, we synthesized and characterized the upconversion nanoparticles without PEI.

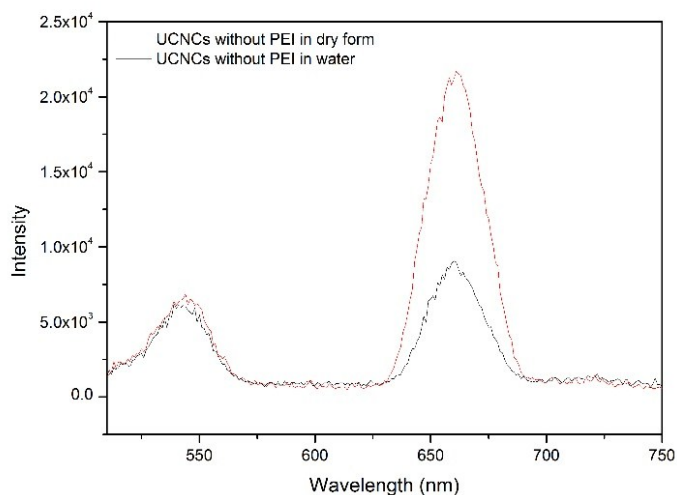

Figure S1. Photoluminescence spectra of NaGdF<sub>4</sub>: Yb<sup>3+</sup>, Er<sup>3+</sup> nanoparticles without PEI modification in solution and in dry form.

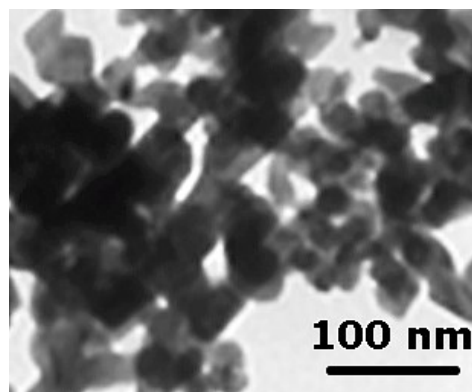

Figure S2. TEM micrograph of the NaGdF<sub>4</sub>: Yb<sup>3+</sup>, Er<sup>3+</sup> nanoparticles without PEI modification.
